# Supplementary material for: Optimization of phospholipid chemistry for improved lipid nanoparticle (LNP) delivery of messenger RNA (mRNA)
Source: Royal Society of Chemistry journal article supplement (doi:10.1039/d1bm01454d), 2021-11-30
Supplement: d1bm01454d1.pdf [file d1bm01454d1.pdf]

## Supplementary Information Appendix

### **Optimization of phospholipid chemistry for improved lipid nanoparticle (LNP) delivery of messenger RNA (mRNA)**

Ester Álvarez-Benedicto<sup>a</sup>, Lukas Farbiak<sup>a</sup>, Martha Márquez Ramírez<sup>a</sup>, Lindsay T. Johnson<sup>a</sup>, Xu Wang<sup>a</sup>, Osamah Mian<sup>a</sup>, Erick D. Guerrero<sup>a</sup>, and Daniel J. Siegwart<sup>†a</sup>

## Supporting Information Figures

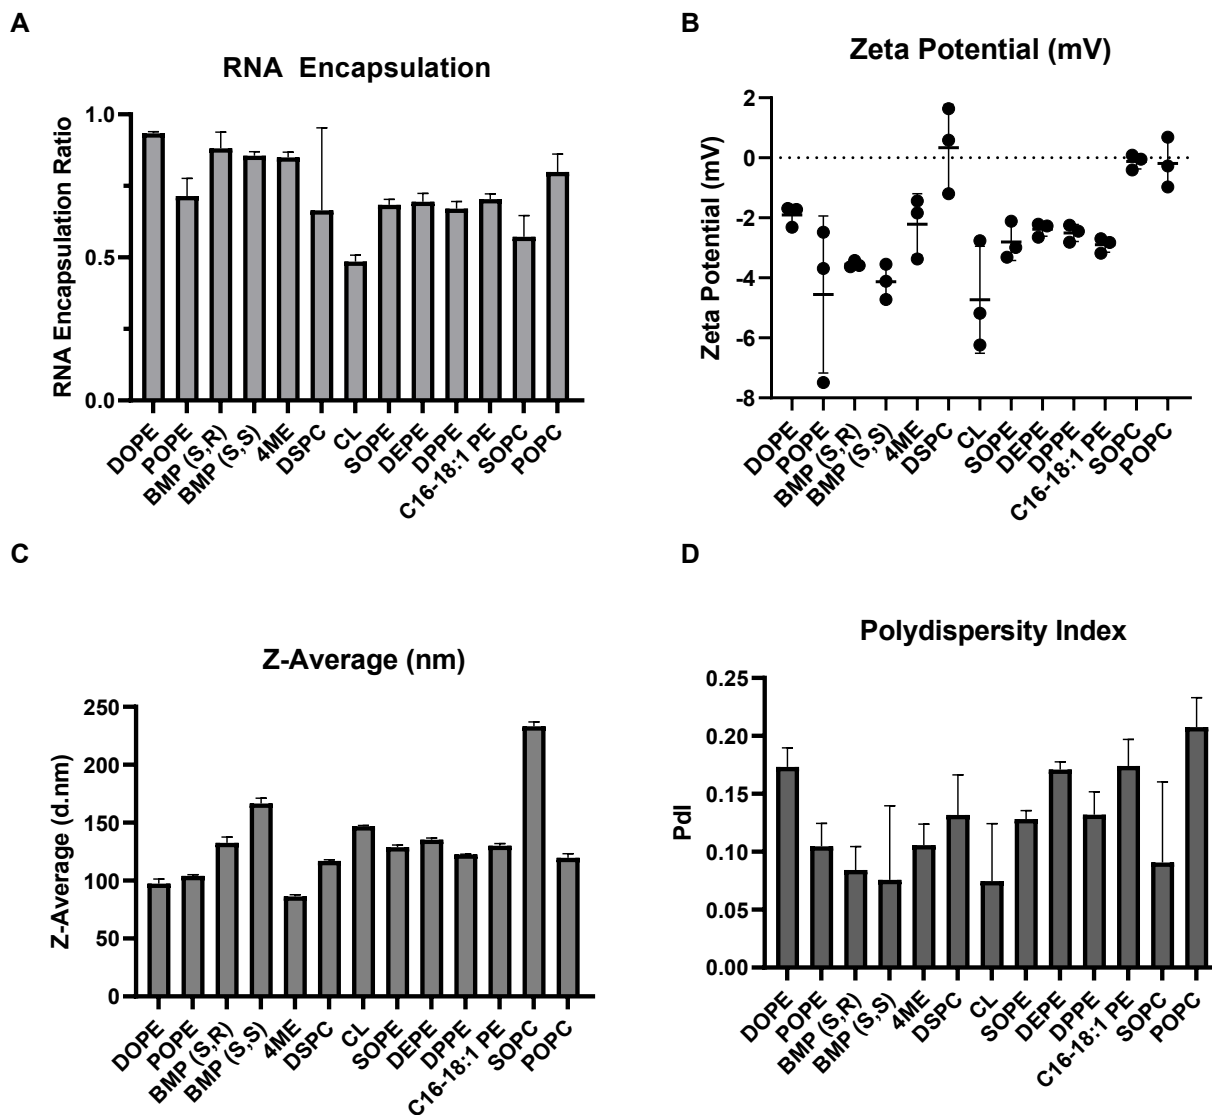

**Figure S1. Characterization of four-component LNPs.** (A) RNA encapsulation results for 4A3-SC8:cholesterol:phospholipid (see x-axis):DMG-PEG2000 (molar ratio = 38.5:30:30:1.5) LNPs (n=4). (B) Surface charge, (C) hydrodynamic diameter, and (D) polydispersity index was also measured for the series of LNPs (n=3).

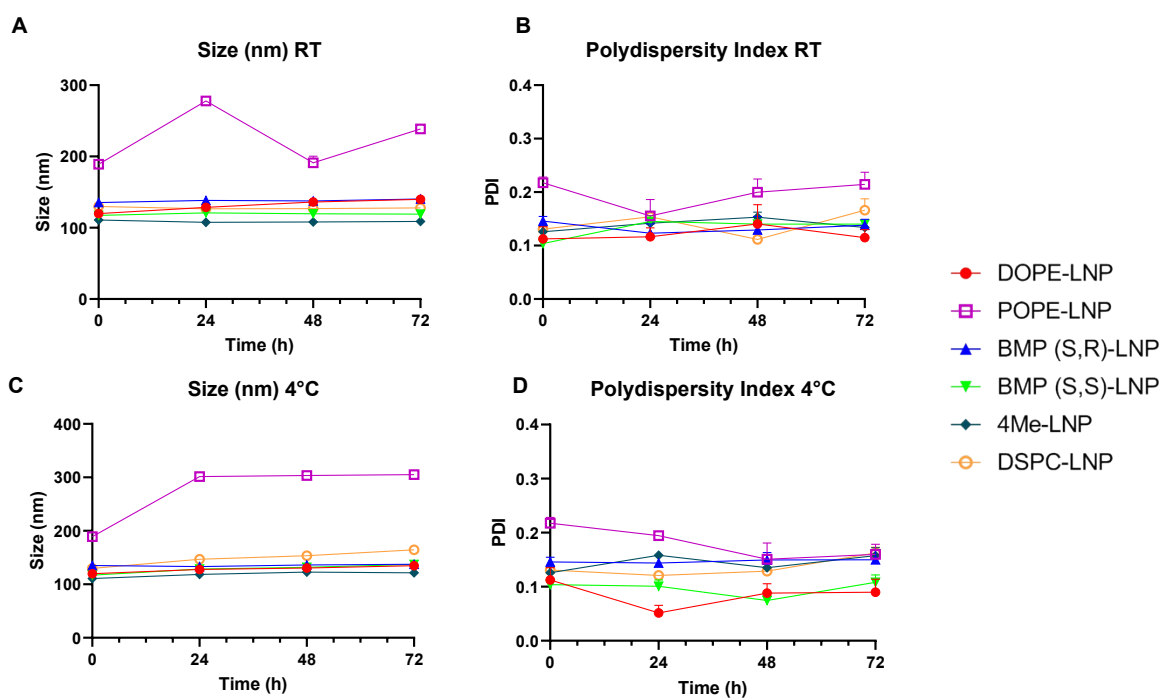

**Figure S2.** LNPs formulated with different phospholipids are stable at room temperature and 4 °C. 4A3-SC8 LNPs were formulated with different phospholipids using the molar ratios 4A3-SC8:Chol:DMG-PEG:PL 38.5:30:3:30 (%mol/mol) and a molar ratio of lipid to mRNA of 10000:1 (weight ratio 23:1). The size and PDI were monitored for 72h at room temperature (A-B) and 4°C (C-D).

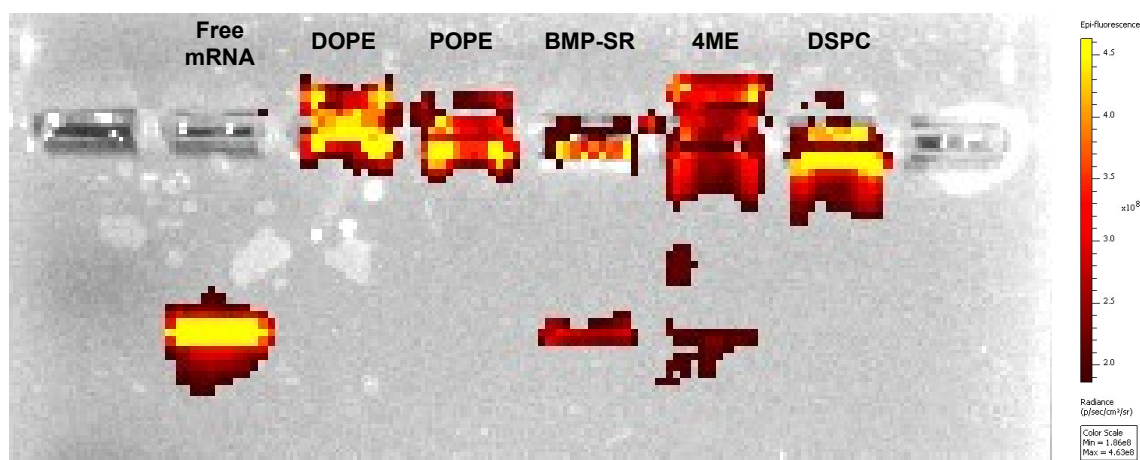

**Figure S3.** LNPs formulated with different PLs encapsulated mRNA. LNPs were formulated with different phospholipids to encapsulate Cy5-labeled mRNA. The gel was imaged using an IVIS Lumina to obtain Cy5 fluorescence emission.

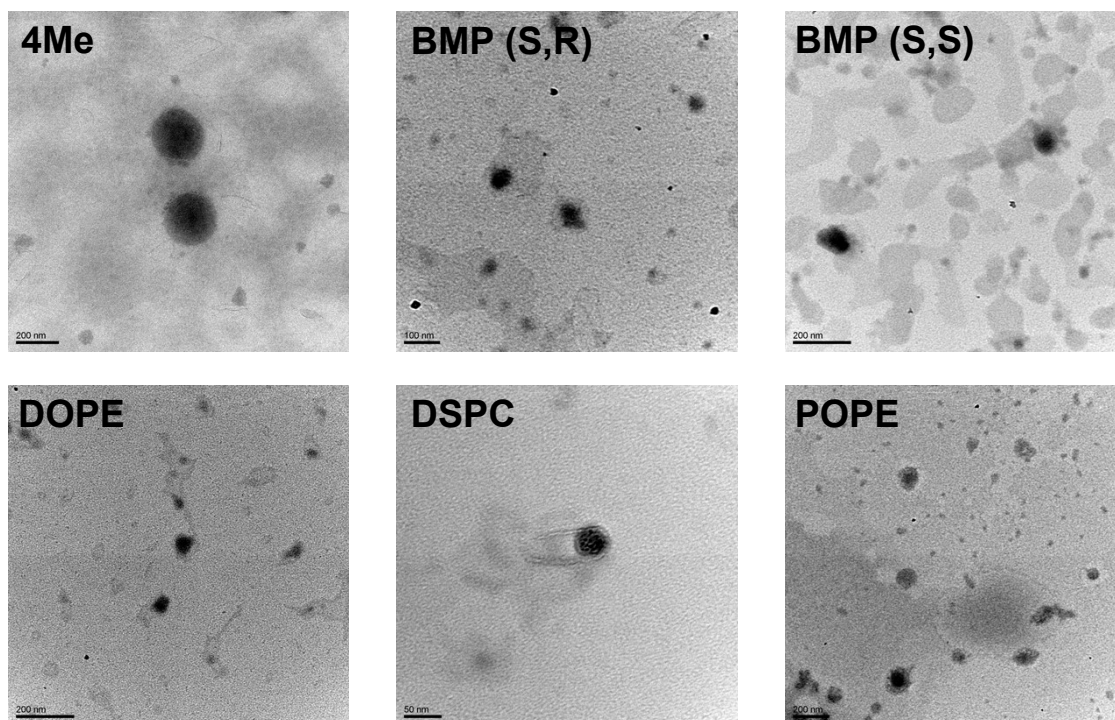

**Figure S4. Transmission Electron Microscopy (TEM) images of LNPs with different phospholipids.** LNPs were formulated with different phospholipids and imaged using TEM. The molar ratio used for the formulations was 4A3-SC8:Chol:Phospholipid:DMG-PEG = 38.5:30:30:1.5 (mol/mol); the mol ratio of 4A3-SC8 to mRNA was 10000:1 and the weight ratio of 4A3-SC8 to mRNA was 23:1.

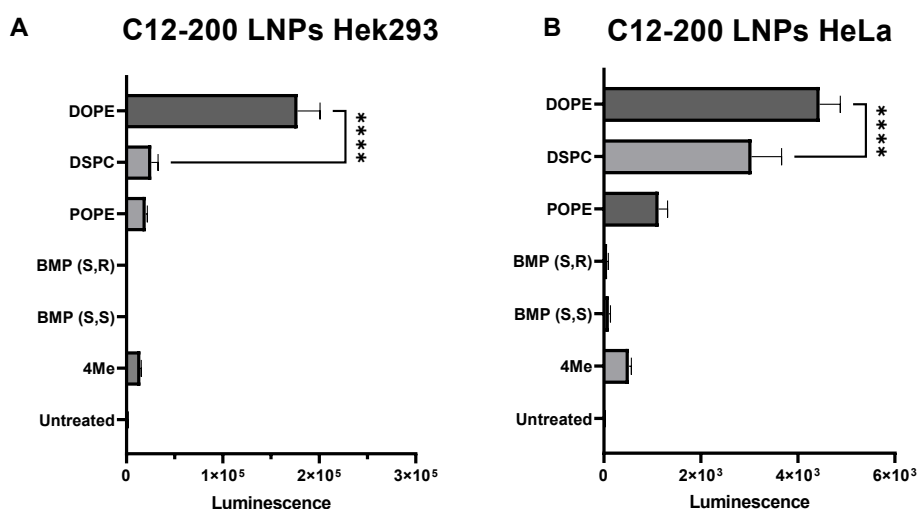

**Figure S5. DOPE phospholipid increases C12-200 LNP mediated mRNA delivery.** Results for luciferase protein activity following delivery of firefly luciferase mRNA (A) Hek293T and (B) HeLa cells. N=4 ± stdev, one-way ANOVA \*\*\*\* p<0.0001, Turkey's test \*\* p<0.001, \* p<0.01.

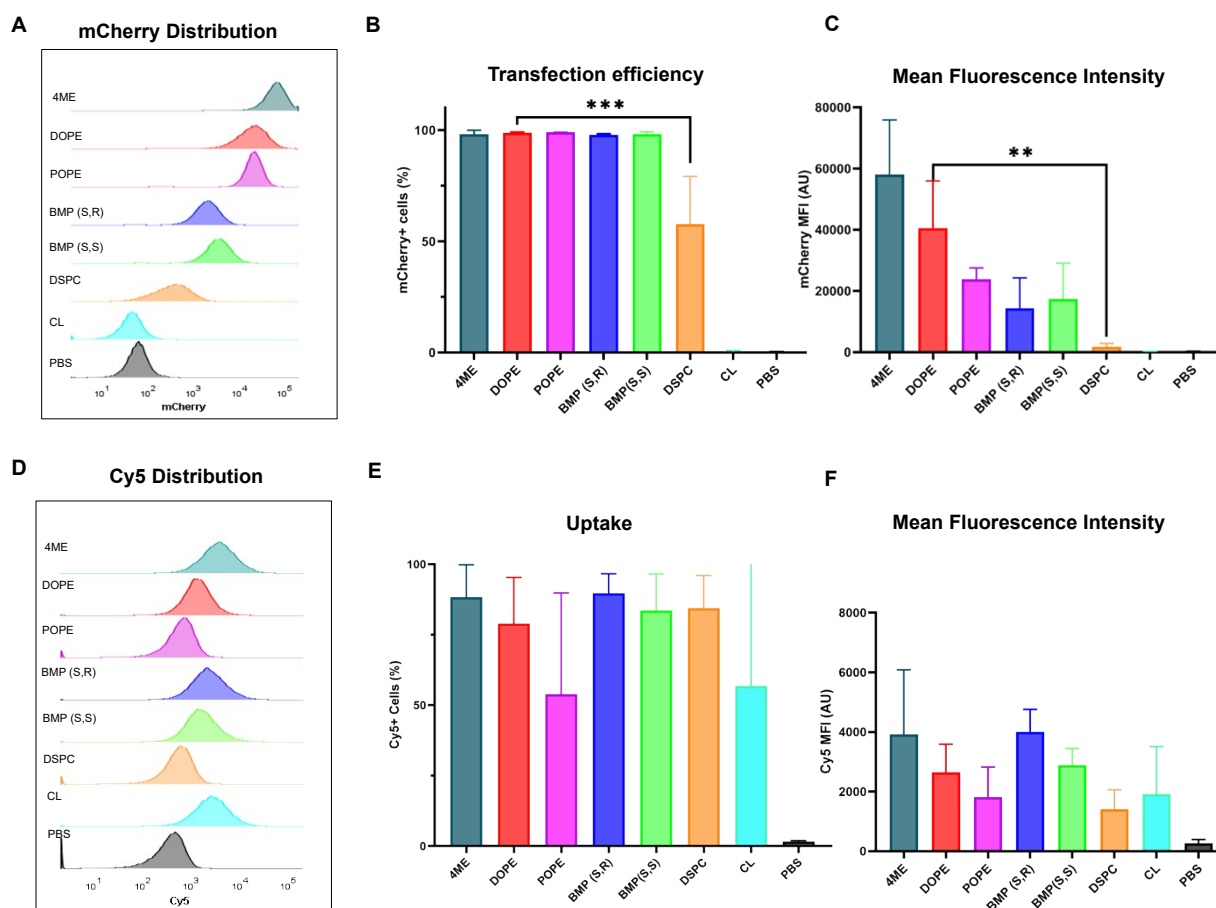

**Figure S6. Uptake of LNPs is not affected by phospholipid identity.** Distribution of mCherry fluorescence (A), percentage of mCherry positive cells (B), and mean fluorescence intensity of each LNP (C) obtained by flow cytometry after 48 h incubation of Hek293T cells with mCherry mRNA-LNPs (250 ng). Uptake of LNP was assessed after 48 h incubation of Hek293T cells with Cy5-labeled mRNA-LNP (250 ng) and flow cytometry was used to determine (D) distribution of Cy5 fluorescence, (E) percentage of Cy5 positive cells, and (F) mean fluorescence intensity.  $N=4 \pm \text{stdev}$ , one-way ANOVA \*\*\*\*  $p < 0.0001$ , Turkey's test \*\*  $p < 0.001$ , \*  $p < 0.01$ .

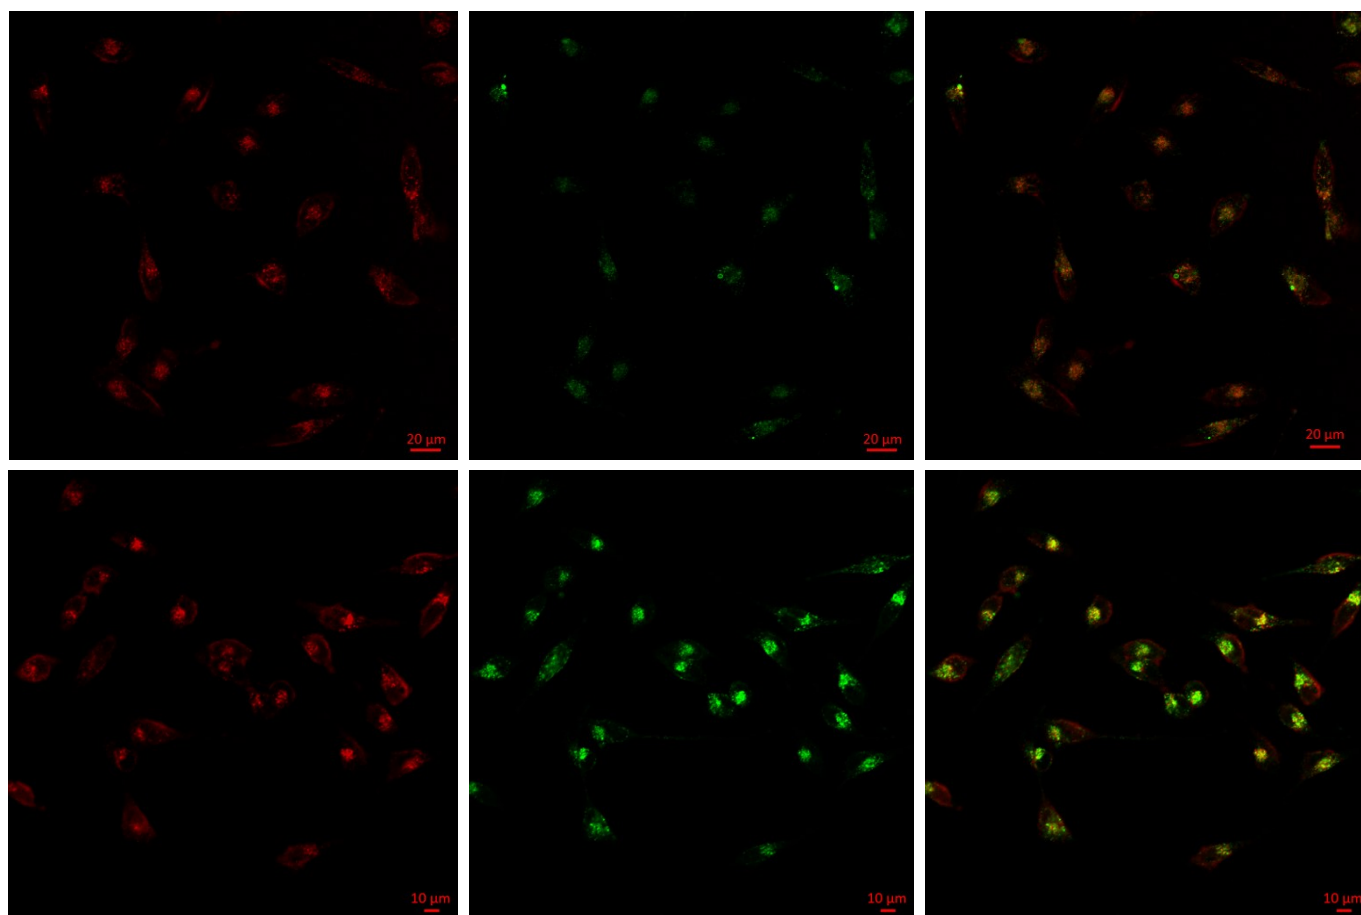

**Figure S7. DOPE-LNP enhances endosomal escape.** Larger size confocal images from **Figure 3A** collected of **Cy5-mRNA** (290 ng) delivered by DOPE-LNP (top images) and DSPC-LNP (bottom images) after 24h incubation and staining with **LysoTracker green**.

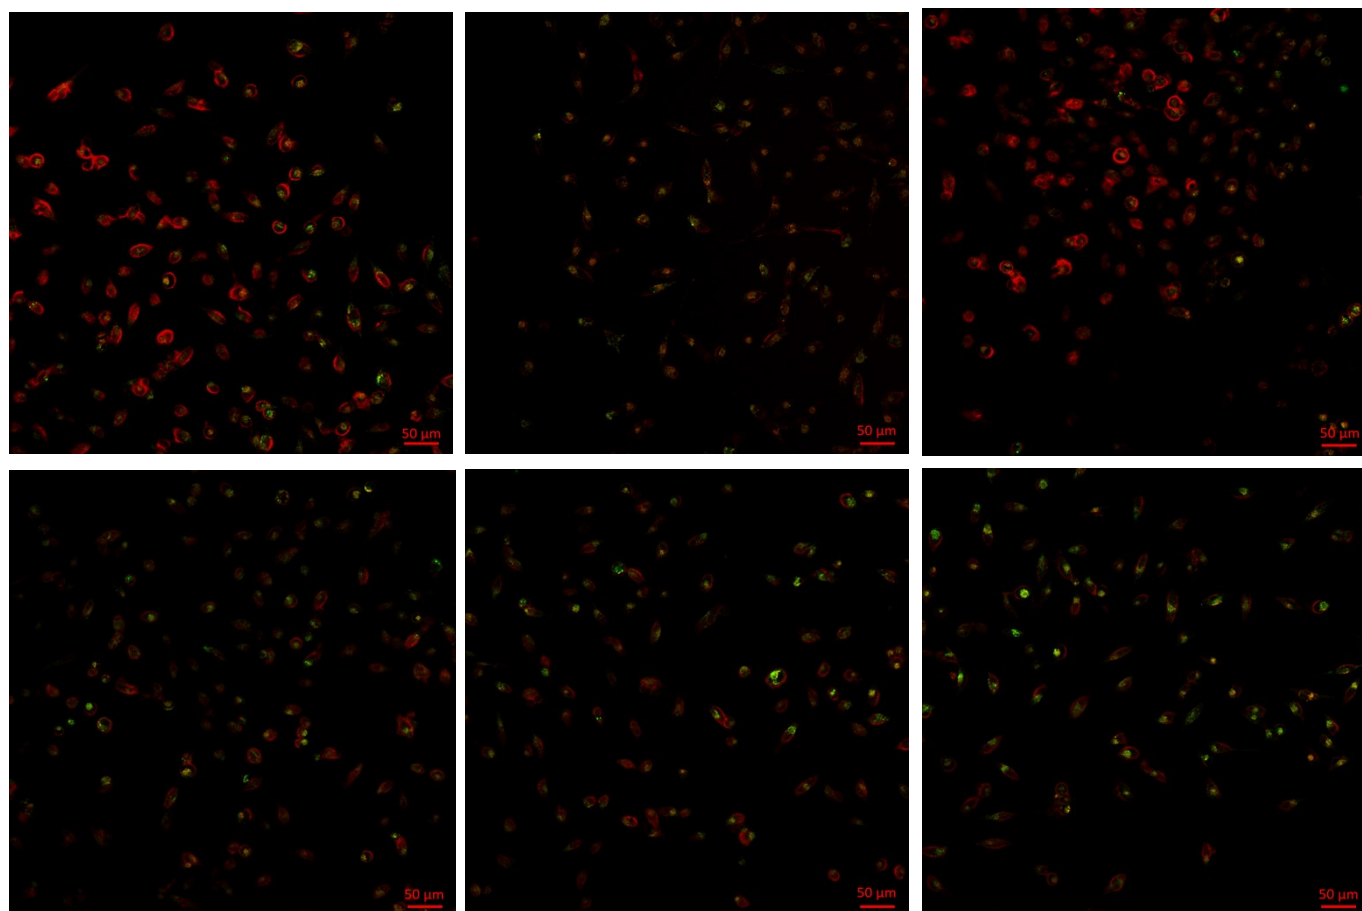

**Figure S8. Lysosome and Cy5-mRNA colocalization.** Additional confocal images collected of Cy5-mRNA (290 ng) delivered by DOPE-LNP (top images) and DSPC-LNP (bottom images) after 24h incubation and staining with LysoTracker green. These images were used to calculate the Pearson coefficient values.

| Pearson's Coefficient |           |
|-----------------------|-----------|
| DOPE-LNPs             | DSPC-LNPs |
| 0.22                  | 0.22      |
| 0.07                  | 0.27      |
| 0.24                  | 0.40      |
| 0.19                  | 0.52      |

**Figure S9. Tabulated Pearson's Coefficients.** Colocalization coefficients obtained from the images in Figure 3 and Figure S4 using ImageJ's PSC colocalization plugin<sup>1</sup>.

| Formulation | Molar Ratio |      |             |         |         | Molar Percentage |       |             |         |         |
|-------------|-------------|------|-------------|---------|---------|------------------|-------|-------------|---------|---------|
|             | 4A3-SC8     | DOPE | Cholesterol | PEG-DMG | SORT PL | 4A3-SC8          | DOPE  | Cholesterol | PEG-DMG | SORT PL |
| BMP-5       | 15          | 15   | 30          | 3       | 3.315   | 22.62            | 22.62 | 45.24       | 4.52    | 5.00    |
| BMP-10      | 15          | 15   | 30          | 3       | 7       | 21.43            | 21.43 | 42.86       | 4.29    | 10.00   |
| BMP-20      | 15          | 15   | 30          | 3       | 15.75   | 19.05            | 19.05 | 38.10       | 3.81    | 20.00   |
| BMP-30      | 15          | 15   | 30          | 3       | 27      | 16.67            | 16.67 | 33.33       | 3.33    | 30.00   |
| BMP-40      | 15          | 15   | 30          | 3       | 42      | 14.29            | 14.29 | 28.57       | 2.86    | 40.00   |
| POPE-20     | 15          | 15   | 30          | 3       | 15.75   | 19.05            | 19.05 | 38.10       | 3.81    | 20.00   |
| 4ME-20      | 15          | 15   | 30          | 3       | 15.75   | 19.05            | 19.05 | 38.10       | 3.81    | 20.00   |
| DSPC        | 15          | 15   | 30          | 3       | 15.75   | 19.05            | 19.05 | 38.10       | 3.81    | 20.00   |
| CL          | 15          | 15   | 30          | 3       | 15.75   | 19.05            | 19.05 | 38.10       | 3.81    | 20.00   |

**Figure S10. Molar ratios and percentages for SORT LNPs.** SORT LNPs were prepared in 40:1 weight ratio of total lipids to mRNA and injected IV at 0.1 mg/kg<sup>2</sup>.

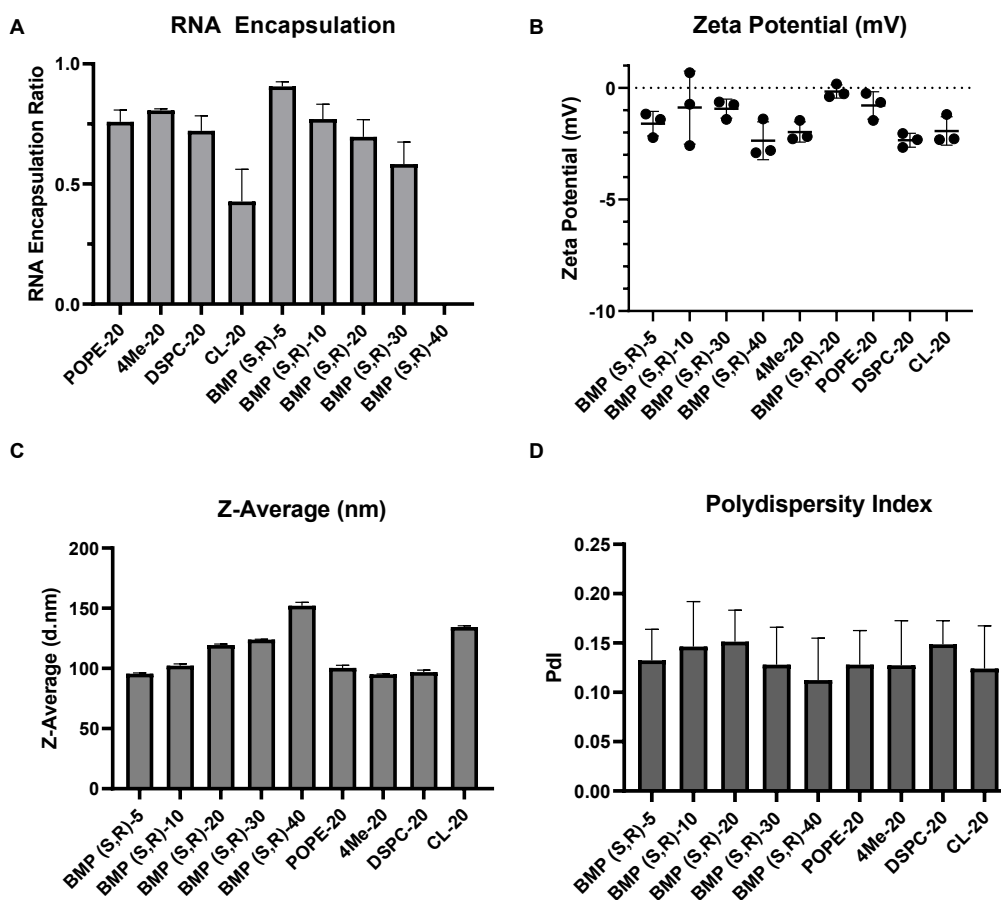

**Figure S11.** Characterization of five-component SORT LNPs. (A) RNA encapsulation results for 4A3-SC8:DOPE:DMG-PEG:phospholipid (see x-axis) (molar ratio = 15:15:30:30:3:x, where x was varied from 5% to 40% (x=3.315, 7, 15.75, 27, 42)) (n=4). (B) Surface charge, (C) hydrodynamic diameter, and (D) polydispersity index was also measured for the series of LNPs (n=3).

## Notes and references

1. A. P. French, S. Mills, R. Swarup, M. J. Bennett and T. P. Pridmore, *Nat. Protoc.*, 2008, **3**, 619-628.
2. Q. Cheng, T. Wei, L. Farbiak, L. T. Johnson, S. A. Dilliard and D. J. Siegwart, *Nat. Nanotechnol.*, 2020, **15**, 313-320.
